# Supplementary material for: Biopsy‐based single‐cell transcriptomics reveals MAIT cells as potential targets for controlling fibrosis‐related liver inflammation due to chronic hepatitis‐B infection
Source: PubMed Central journal article supplement (PMC9582669; doi:10.1002/ctm2.1073), 2022-10-20

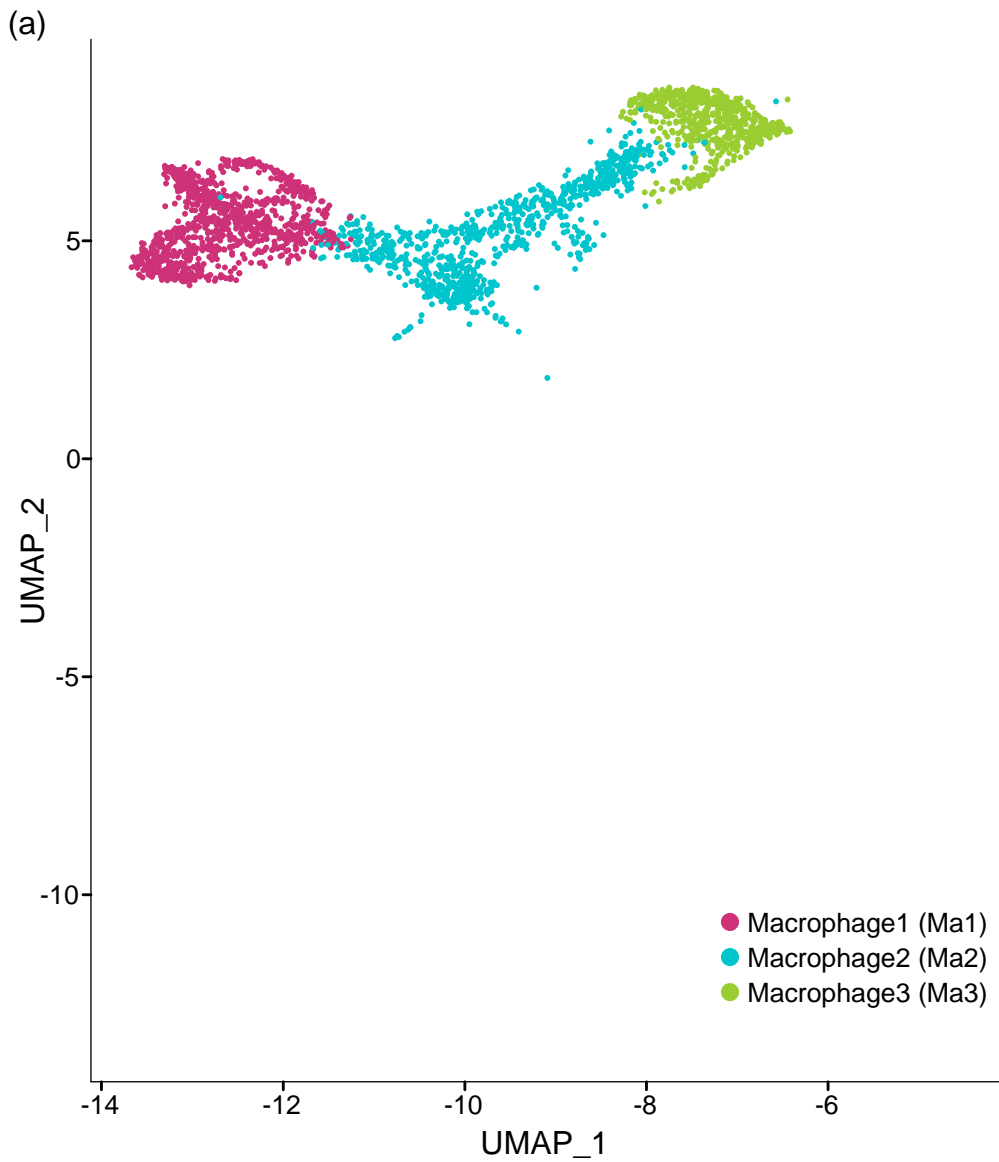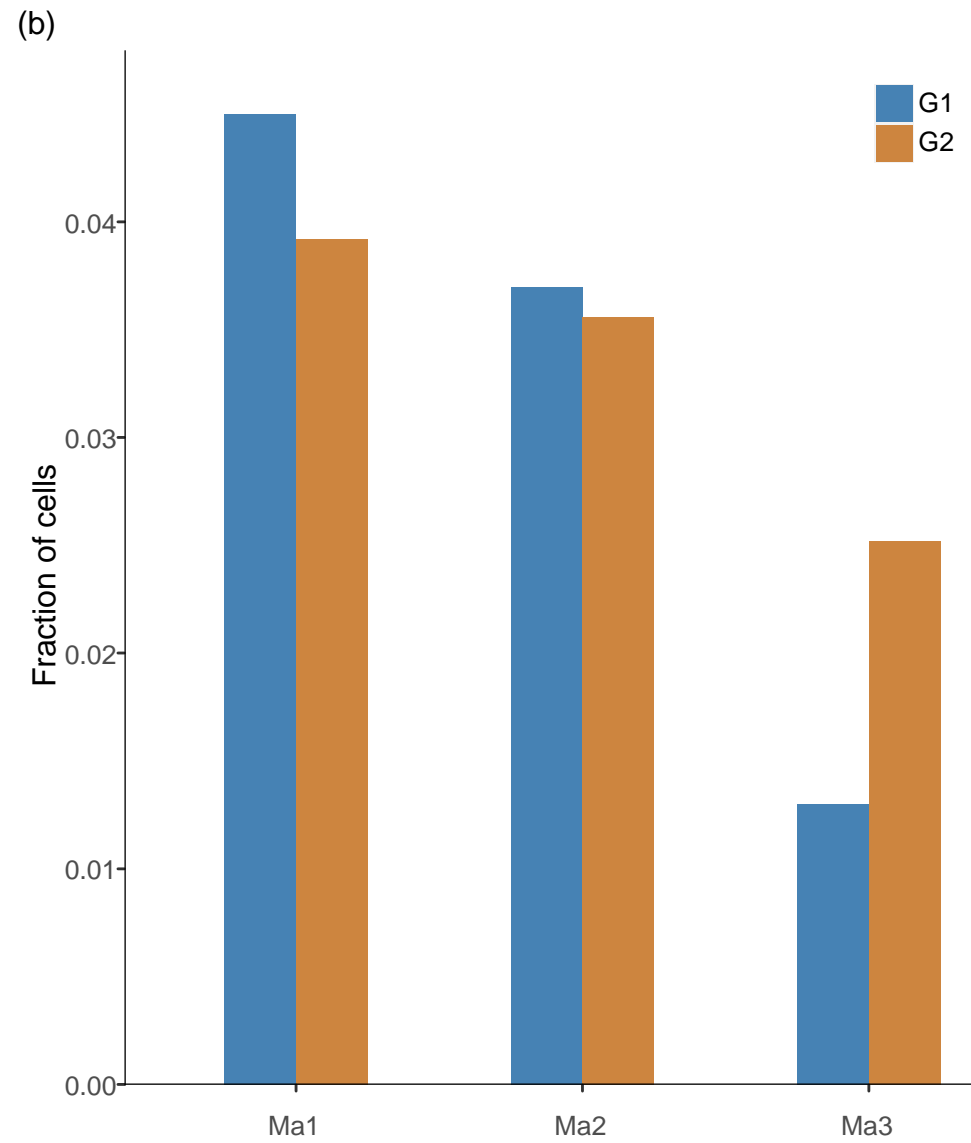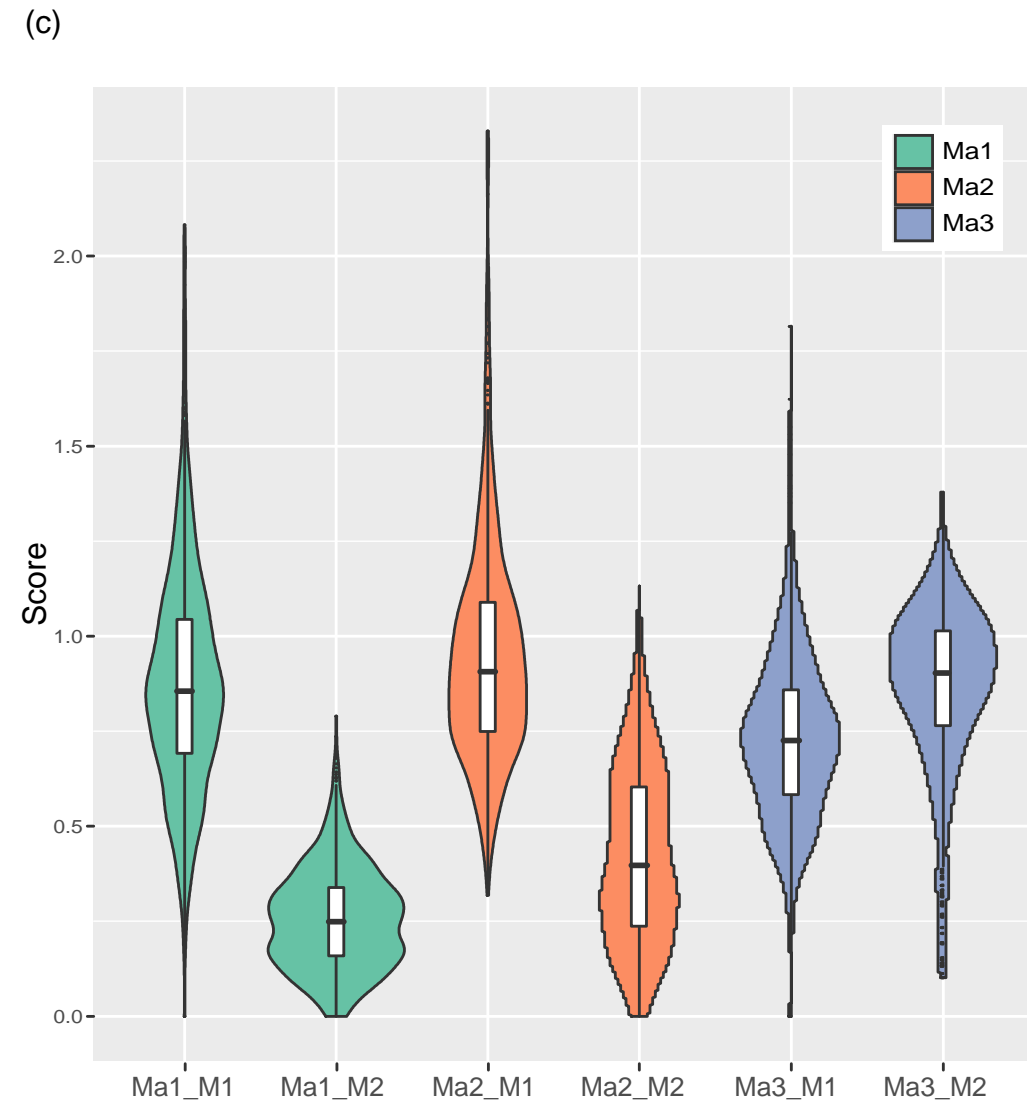

Supplement: CTM2-12-e1073-s001.pdf [file CTM2-12-e1073-s001.pdf]
